# Supplementary material for: Portable XRF analysis of occupational air filter samples from different workplaces using different samplers: final results, summary and conclusions
Source: Royal Society of Chemistry journal article supplement (doi:10.1039/b710591f), 2007-01-01
Supplement: b710591f.pdf [file b710591f.pdf]

## Appendix 1 – Low Concentrations: Limit on the Limit of Quantitation (LOQ)

Suppose raw mass estimates  $m_{\text{raw}}$  may be modeled as:

$$m_{\text{raw}} = m_{\text{ref}} \cdot (1 + \text{bias}) + m_{\text{ref}} \cdot \varepsilon[\text{TRSD}_{\text{raw}}] + \varepsilon_0[\sigma_{\text{raw}}],$$

where *bias* is specific to a low-concentration range, and where the  $\varepsilon$ s are normally distributed random variables. Often at higher concentrations,  $\varepsilon_0$  is negligible and the *relative* standard deviation is roughly constant over a concentration range. However, at low concentrations sampled, the standard deviation may become independent of the mass, hence the term  $\varepsilon_0$  giving the limiting standard deviation  $\sigma_{\text{raw}}$ .

In evaluating the method many pairs of measurements  $m_{\text{raw}}$  and  $m_{\text{ref}}$  are made, yielding an estimate  $\hat{\text{bias}}$ :

$$\hat{\text{bias}} = \sum (m_{\text{raw}} - m_{\text{ref}}) / m_{\text{ref}}.$$

The bias-corrected mass estimate  $m$  is then

$$\begin{aligned} m &\equiv m_{\text{raw}} / (1 + \hat{\text{bias}}) \\ &= m_{\text{ref}} \frac{1 + \text{bias}}{1 + \hat{\text{bias}}} + m_{\text{ref}} \cdot \varepsilon[\text{TRSD}] + \varepsilon_0[\sigma], \end{aligned}$$

where the bias-corrected  $\sigma$  is:

$$\sigma = \sigma_{\text{raw}} / (1 + \hat{\text{bias}}),$$

needed for estimating an upper limit on the *limit of quantitation LOQ* given by

$$\text{LOQ} = 10 \times \sigma.$$

Thus, the corrected error is:

$$\begin{aligned} \text{error} &\equiv (m - m_{\text{ref}}) / m_{\text{ref}} \\ &\approx \varepsilon[\text{TRSD}] + \varepsilon_0[\sigma] / m_{\text{ref}}, \end{aligned}$$

neglecting a term proportional to  $\text{bias} - \hat{\text{bias}}$ . Ignoring correlation between  $\varepsilon_0$  and  $\varepsilon$ , the expected value:

$$E[\text{error}^2] \approx \text{TRSD}^2 + \sigma^2 \cdot m_{\text{ref}}^{-2}.$$

Thus, by approximating  $\text{error}^2$  as normally distributed, through linear regression on  $m_{\text{ref}}^{-2}$ , the parameter  $\sigma^2$  may be estimated and limits determined.

*Example – low-concentration XRF and ICP (reference) data*

Twenty eight data points with  $m_{\text{ref}}$  between 5  $\mu\text{g}$  and 15  $\mu\text{g}$  were taken, with bias estimated at 6.4%. The data for  $\text{error}^2$  are shown in the figure:

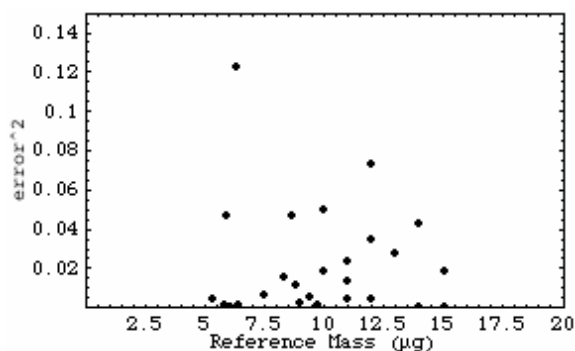

Figure A-1.

Though there is no obvious divergence proportional to  $m_{\text{ref}}^{-2}$  visible, limits on  $\sigma^2$  may yet be determined through linear regression, the results of which are presented here:

```
{ANOVATable →
      DF      SumOfSq      MeanSq      FRatio      PValue
Model      1      0.0317432      0.0317432      1.46243      0.237427
Error     26      0.564352      0.0217058
Total     27      0.596095

ParameterCITable →
      Estimate      SE      CI
1      0.0507728      0.0503441      {-0.052711, 0.154257}
1/x^2    -3.66646      3.03187      {-9.89855, 2.56563}

ParameterConfidenceRegion → Ellipsoid[{0.0507728, -3.66646},
      {7.87079, 0.072266}, {{-0.0138343, 0.999904}, {0.999904, 0.0138343}}]}
```

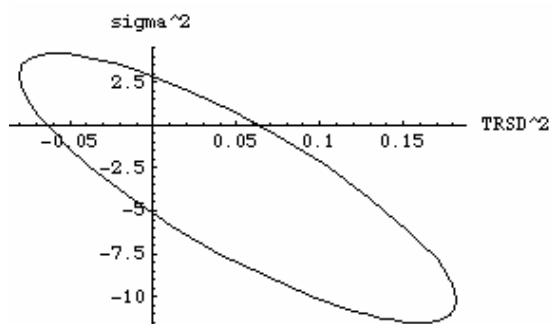

Figure A-2. 95% confidence region on the determined parameters.

The confidence intervals given in the table are two-sided at the 95% confidence level, whereas we are interested in a single-sided interval  $\sigma^2 < \sigma_{95\%}^2$ :

$$\sigma_{95\%}^2 = \hat{\sigma}^2 + SE \cdot t_{\nu, 0.95},$$

where  $t_{\nu, 0.95} = 1.7056$  is the 95% StudentT quantile at  $\nu = 26$  degrees of freedom. Thus,

$$\sigma_{95\%}^2 = -3.66646 + 1.70562 \times 3.03187 = 1.505.$$

Finally,

$$\begin{aligned} LOQ_{95\%} &= 10 \times \text{Sqrt}[\sigma_{95\%}^2] \\ &= 12.3 \text{ } \mu\text{g}. \end{aligned}$$

For this set of data,  $LOQ < 12.3 \text{ } \mu\text{g}$  at the 95% confidence level.
